# Supplementary material for: Prevalence, knowledge and education level associated with secondhand smoke exposure among never-smoking women in Inner Mongolia, Northern China
Source: PubMed Central journal article supplement (PMC7199659; doi:10.18332/tid/119162), 2020-04-24
Supplement: TID-18-35-s1.pdf [file TID-18-35-s1.pdf]

**Table S1. Characteristics of never-smoking women in Inner Mongolia, 2015, by exposure to secondhand smoke (SHS) (N=2293)**

| Variables                | Female             |                 | $\chi^2$ | P-value   |
|--------------------------|--------------------|-----------------|----------|-----------|
|                          | No exposure to SHS | Exposure to SHS |          |           |
| <b>Age</b>               |                    |                 | 34.283   | < 0.001** |
| Elderly women            | 257(45.89)         | 303(54.11)      |          |           |
| Middle-aged women        | 342(33.53)         | 678(66.47)      |          |           |
| Young women              | 221(31.00)         | 492(69.00)      |          |           |
| <b>Ethnicity</b>         |                    |                 | 16.259   | < 0.001** |
| Han                      | 639(34.23)         | 1228(65.77)     |          |           |
| Mongolian                | 116(38.80)         | 183(61.20)      |          |           |
| Other minority           | 65(51.18)          | 62(48.82)       |          |           |
| <b>Marital status</b>    |                    |                 | 20.569   | < 0.001** |
| Single                   | 18(35.29)          | 33(64.71)       |          |           |
| Married                  | 731(34.63)         | 1380(65.37)     |          |           |
| Widowed/Divorced         | 71(54.20)          | 60(45.80)       |          |           |
| <b>Education</b>         |                    |                 | 2.793    | 0.247     |
| Low(Illiteracy)          | 234(35.62)         | 423(64.38)      |          |           |
| Middle(Junior school)    | 484(34.23)         | 930(65.77)      |          |           |
| High(Senior high school) | 102(45.95)         | 120(54.05)      |          |           |
| <b>Occupation</b>        |                    |                 | 11.475   | 0.003*    |
| Unemployed               | 234(35.62)         | 423(64.38)      |          |           |
| Employed                 | 484(34.23)         | 930(65.77)      |          |           |
| Retired                  | 102(45.95)         | 120(54.05)      |          |           |
| <b>Area</b>              |                    |                 | 0.001    | 0.970     |
| Urban                    | 377(35.80)         | 676(64.20)      |          |           |
| Rural                    | 443(35.73)         | 797(64.27)      |          |           |

SHS: secondhand smoke.

\*\* Significant at  $p < 0.001$ ; \* Significant at  $p < 0.05$ .

**Table S2. Knowledge about low-tar cigarettes among never-smoking women in Inner Mongolia, 2015 (N=2293)**

| Variables                                                                               | Female      |                   |               | $\chi^2$ | P-value  |
|-----------------------------------------------------------------------------------------|-------------|-------------------|---------------|----------|----------|
|                                                                                         | Young women | Middle-aged women | Elderly women |          |          |
| <b>Did you agree that the harm of low-tar cigarettes is less than regular cigarette</b> |             |                   |               | 37.646   | <0.001** |
| Agreement                                                                               | 256(35.90)  | 308(30.20)        | 144(25.71)    |          |          |
| Disagreement                                                                            | 115(16.13)  | 111(10.88)        | 59(10.54)     |          |          |
| Unknown                                                                                 | 342(47.97)  | 601(58.92)        | 357(63.75)    |          |          |

\*\* Significant at  $p < 0.001$ .

**Table S3. Knowledge about low-tar cigarettes among young never-smoking women in Inner Mongolia, 2015, by exposure to SHS (N=713)**

| Variables                                                                                | No exposure to SHS | Exposure to SHS | $\chi^2$ | <i>P</i> -value |
|------------------------------------------------------------------------------------------|--------------------|-----------------|----------|-----------------|
| <b>Did you agree that the harm of low-tar cigarettes is lower than regular cigarette</b> |                    |                 | 6.438    | 0.040*          |
| Agreement                                                                                | 66(29.86)          | 190(38.62)      |          |                 |
| Disagreement                                                                             | 34(15.38)          | 81(16.46)       |          |                 |
| Unknown                                                                                  | 121(54.75)         | 221(44.92)      |          |                 |

SHS: secondhand smoke.

\*Significant at  $p < 0.05$ .
